# Supplementary material for: Multi-spectral fluorescent reporter influenza viruses (Color-flu) as powerful tools for in vivo studies
Source: PubMed Central journal article supplement (PMC4389232; doi:10.1038/ncomms7600), 2015-03-25
Supplement: ncomms7600-s1.pdf [file ncomms7600-s1.pdf]

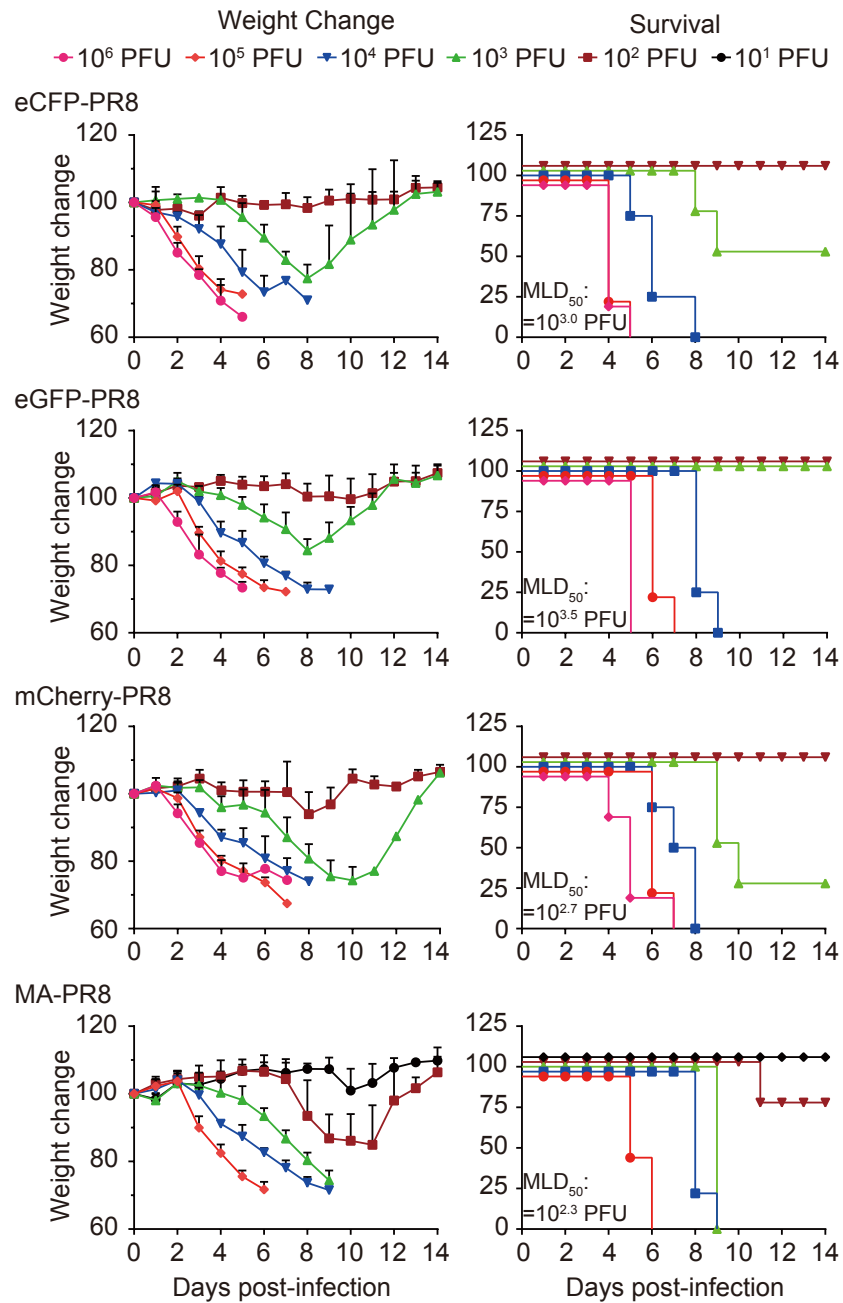

**Supplementary Figure 1. Pathogenicity of Color-flu viruses in mice.** Four B6 mice per group were intranasally inoculated with MA-eCFP, eGFP, mCherry-PR8, and MA-PR8. Body weight and survival were monitored for 14 days.

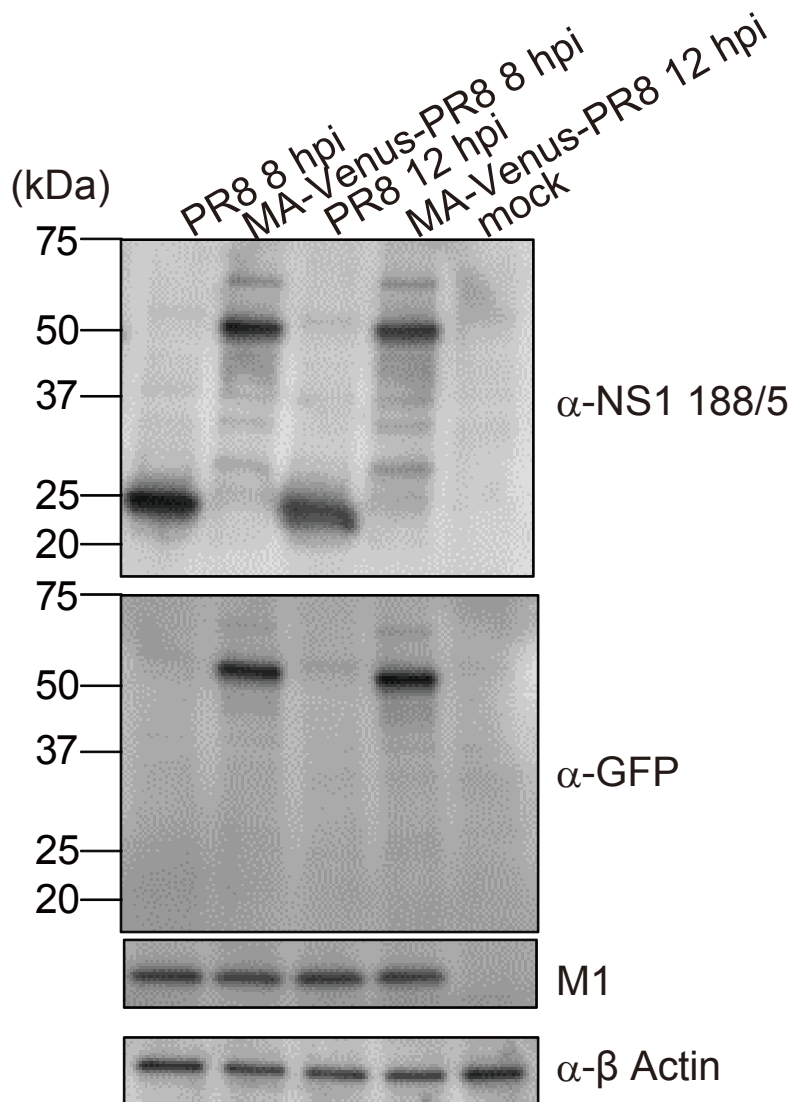

**Supplementary Figure 2. Stability of an NS1-Venus chimera in MDCK cells.**

MDCK cells were infected with MA-Venus-PR8 or WT-PR8 at an MOI of 3. At 8 and 12 h after infection, NS1, Venus, M1, and  $\beta$ -actin were detected by means of western blotting.

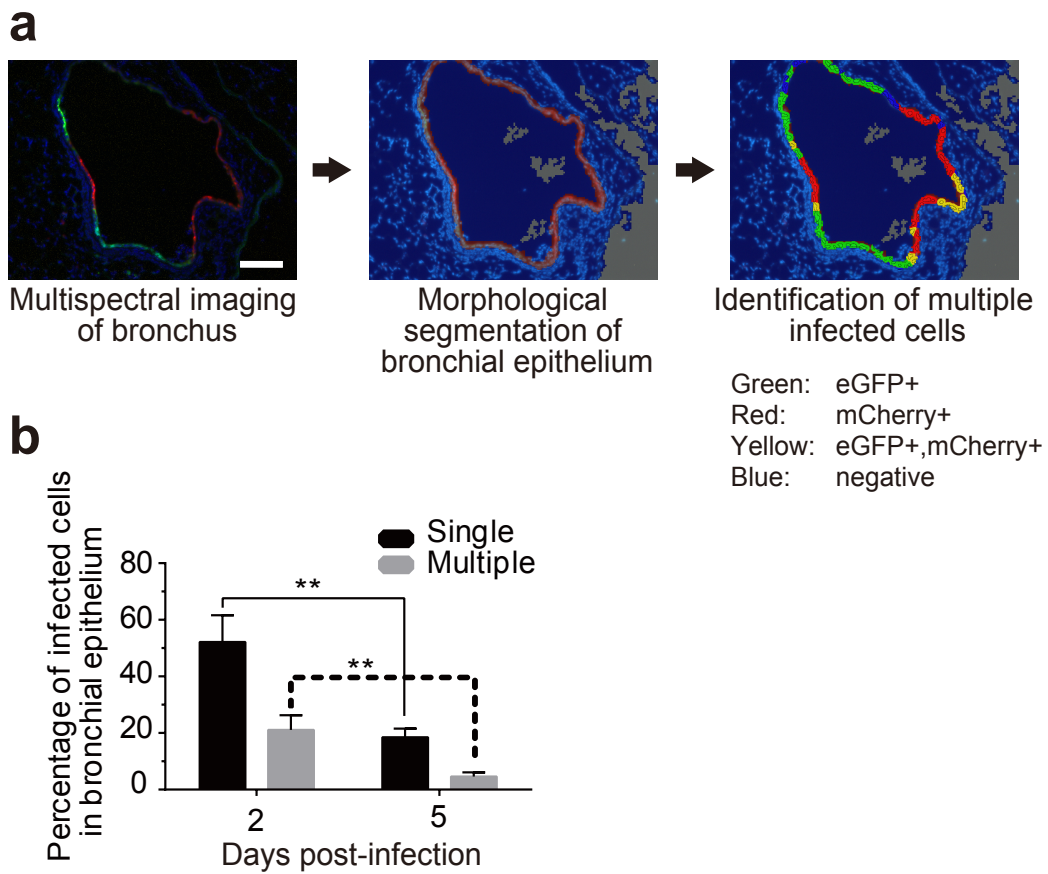

**Supplementary Figure 3. Histological analysis of multiple infection in the lungs.** B6 mice were intranasally inoculated with a mixture of MA-eCFP, eGFP, Venus, and mCherry-PR8 ( $2.5 \times 10^4$  PFU per strain). Lung sections were prepared from mice on days 2 and 5 p.i. (3 mice per time point). (a) Representative analysis of the area in the virus-infected bronchus from mice on day 2 p.i. by using an inverted fluorescence microscope with a Nuance FX multispectral imaging system and inForm software. (b) Cells infected with a single or multiple viruses in the bronchial epithelium. The statistical significance of differences was calculated using Student's t-test, and  $**P$  value was  $< 0.01$  compared with a sample from day 5 p.i.

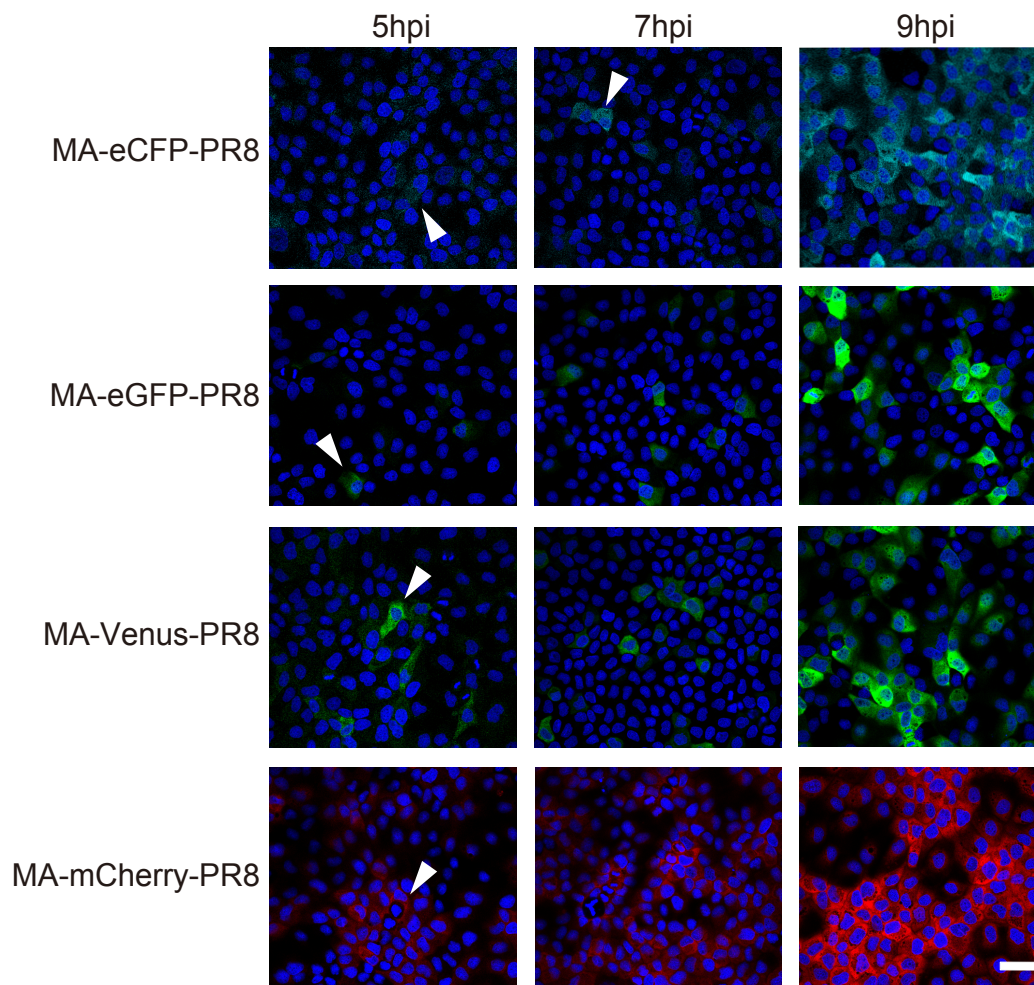

**Supplementary Figure 4. Imaging of Color-flu virus-infected cells.** MDCK cells were infected with Color-flu viruses at an MOI of 2. At 5, 7, and 9 h p.i., cells were visualized with a confocal microscopy. Arrowheads indicate cells expressing the fluorescent signal of each strain of Color-flu virus. Scale bar, 50 $\mu$ m.

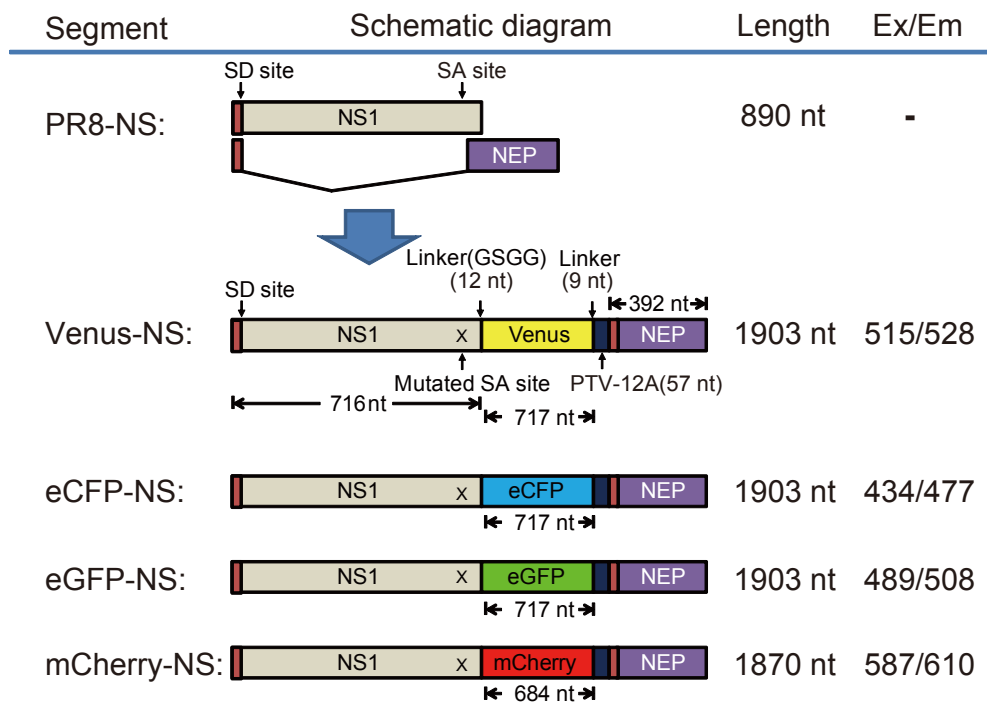

**Supplementary Figure 5. Schematic diagrams of the NS segments of PR8 fused with different fluorescent reporter genes.** The open reading frame (ORF) of the NS1 gene without a stop codon was fused with the N-terminus of fluorescent reporter genes (Venus, eCFP, eGFP, and mCherry) via a sequence encoding the protein linker GSGG. The fluorescent genes are followed by a sequence encoding the GSG linker, a foot-and-mouth virus protease 2A autoproteolytic site with 57 nucleotides from porcine teschovirus-1, and by the ORF of NEP. In addition, silent mutations were introduced into the endogenous splice acceptor site of the NS1 ORF to prevent splicing.
